# Supplementary material for: Impact of Maternal High Stocking Density during the Dry Period on Dairy Calf Health, Behaviour, and Welfare
Source: MDPI journal article supplement (doi:10.3390/ani10060922), 2020-05-26
Supplement: s1 [file s1]

# Supplementary Files: Impact of Maternal High Stocking Density during the Dry Period on Dairy Calf Health, Behaviour, and Welfare

Mayumi Fujiwara, Marie J Haskell, Alastair I Macrae and Kenneth MD Rutherford

**Table S1.** Median latencies (IQR) calculated from raw data for each of the behaviours and hazard ratios [95% CIs] of L calves in performing each of the behaviours during the first 30 minutes in the group pen.

| Behaviour                     | Median (Seconds)<br>(IQR) |                      | Hazard Ratio<br>[95% CIs] | P-Value |
|-------------------------------|---------------------------|----------------------|---------------------------|---------|
|                               | High Stocking             | Low Stocking         | Reference<br>=H Group     |         |
| Walk                          | 6.6<br>(3.0–13.2)         | 8.4<br>(3.6–23.4)    | 0.56<br>[0.23–1.33]       | 0.186   |
| Run                           | 46.8<br>(24.6–115.8)      | 42.0<br>(33.6–160.2) | 0.86<br>[0.36–2.04]       | 0.728   |
| Explore                       | 24.0<br>(15.0–35.4)       | 16.2<br>(7.8–97.8)   | 2.13<br>[0.97–4.66]       | 0.061   |
| Initiate<br>social contact    | 16.2<br>(7.8–97.8)        | 21.0<br>(6.0–69.6)   | 0.69<br>[0.30–1.58]       | 0.381   |
| Receive<br>social contact     | 68.4<br>(15.6–195.6)      | 87.6<br>(34.8–217.8) | 1.24<br>[0.56–2.72]       | 0.598   |
| <b>N calves performed (%)</b> |                           |                      |                           |         |
| Lie down *                    | 19/20 (95.0)              | 13/15 (86.7)         | 1.63 [0.55–4.89]          | 0.380   |
| Enter the igloo shed *        | 9/20 (45.0)               | 8/15 (53.3)          | 1.17 [0.49–2.77]          | 0.728   |

\* Censoring occurred for the latencies to lie down and enter the igloo shed, hence medians could not be calculated. Number and percentage of calves performing the behaviours are presented.

**Table S2.** Time spent on each of the behaviours, the location (duration) and the frequency of each of the behaviours observed in the first 30 minutes in the group pen. Figures indicate predicted means  $\pm$  SEM or back-transformed means [95%CIs] for the data analysed following a log-transformation.

| Behaviour                       | High Stocking  | Low Stocking   | W Statistic | p-Value |
|---------------------------------|----------------|----------------|-------------|---------|
| <b>Duration (minutes)</b>       |                |                |             |         |
| Standing inactive               | 7.7 $\pm$ 1.2  | 8.0 $\pm$ 1.2  | 0.1         | 0.722   |
| Walking                         | 5.6 $\pm$ 0.4  | 5.9 $\pm$ 0.5  | 0.2         | 0.686   |
| Running                         | 1.6 $\pm$ 0.4  | 1.4 $\pm$ 0.4  | 0.1         | 0.729   |
| Exploring                       | 7.5 $\pm$ 1.2  | 8.9 $\pm$ 1.2  | 1.7         | 0.257   |
| Social interaction              | 1.1 [0.7–2.0]  | 0.8 [0.5–1.5]  | 1.9         | 0.179   |
| Straw yard                      | 17.9 $\pm$ 2.3 | 18.7 $\pm$ 2.6 | 0.1         | 0.725   |
| Igloo shed                      | 10.3 $\pm$ 2.6 | 9.8 $\pm$ 2.8  | 0.1         | 0.833   |
| <b>Frequency (count/30 min)</b> |                |                |             |         |
| Walking                         | 44.9 $\pm$ 7.4 | 48.1 $\pm$ 8.8 | 0.2         | 0.638   |
| Running                         | 20.9 $\pm$ 3.8 | 21.4 $\pm$ 4.0 | <0.1        | 0.923   |
| Exploring                       | 47.0 $\pm$ 8.2 | 56.9 $\pm$ 9.8 | 1.8         | 0.194   |
| Exploring (straw yard)          | 25.1 $\pm$ 6.2 | 35.6 $\pm$ 7.1 | 2.6         | 0.117   |
| Exploring (igloo shed)          | 19.5 $\pm$ 4.8 | 17.8 $\pm$ 5.1 | 0.1         | 0.822   |
| Social contact initiated        | 12.9 $\pm$ 4.0 | 10.9 $\pm$ 4.3 | 0.3         | 0.570   |
| Social contact received         | 12.8 $\pm$ 1.7 | 17.1 $\pm$ 2.0 | 4.2         | 0.051   |
